# Supplementary material for: A novel coumarin derivative as a sensitive probe for tracing intracellular pH changes
Source: Royal Society of Chemistry journal article supplement (doi:10.1039/c4ra11347k), 2015-01-01
Supplement: c4ra11347k1.pdf [file c4ra11347k1.pdf]

## Electronic Supplementary Information

### **A novel coumarin derivative as sensitive probe for tracing intracellular pH changes**

Mengqiang Liu<sup>a\*</sup>, Minshan Hu<sup>c\*</sup>, Qian Jiang<sup>a</sup>, Zhiyun Lu<sup>a</sup>, Yan Huang<sup>a</sup>, Yanfei Tan<sup>\*b</sup>, Qing Jiang<sup>\*a,b</sup>

<sup>a</sup>Key Laboratory of Green Chemistry and Technology (Ministry of Education), College of Chemistry, Sichuan University, Chengdu 610064, China.

<sup>b</sup>National Engineering Research Center for Biomaterials, Sichuan University, Chengdu, 610064, China.

<sup>c</sup>Department of Biochemistry and Molecular Biology, West China School of Preclinical and Forensic Medicine, Sichuan University, Chengdu, 610041, China.

\* To whom correspondence should be addressed. Tel: +86 28 85415123;

email: [tanyf@scu.edu.cn](mailto:tanyf@scu.edu.cn) (Y. Tan)

\* To whom correspondence should be addressed. Fax: +86 28 85412848;

email: [jiangq@scu.edu.cn](mailto:jiangq@scu.edu.cn) (Q. Jiang)

## Table of contents

|                                                                                                       |    |
|-------------------------------------------------------------------------------------------------------|----|
| Figure S1 Absorption spectra in different solvents.....                                               | 3  |
| Figure S2 Fluorescence spectra in different solvents .....                                            | 3  |
| Table S1 UV-VIS and fluorescence emission data in different solvents .....                            | 3  |
| Figure S3 The absorption spectra, absorption curve and excitation spectra of <b>CS-P</b> .....        | 4  |
| Figure S4 Fluorescence spectra of <b>CS</b> in various pH values.....                                 | 4  |
| Figure S5 Ion interfering to <b>CS-P</b> .....                                                        | 5  |
| Figure S6 Reversibility of <b>CS-P</b> .....                                                          | 5  |
| Figure S7 Photostability of <b>CS-P</b> .....                                                         | 5  |
| Figure S8 Cytotoxicity of <b>CS-P</b> .....                                                           | 6  |
| Figure S9 <sup>1</sup> H NMR, <sup>13</sup> C NMR, FT-IR and HR-ESI-MS spectrum of <b>CS</b> .....    | 8  |
| Figure S10 <sup>1</sup> H NMR, <sup>13</sup> C NMR, FT-IR and HR-ESI-MS spectrum of <b>CS-P</b> ..... | 10 |

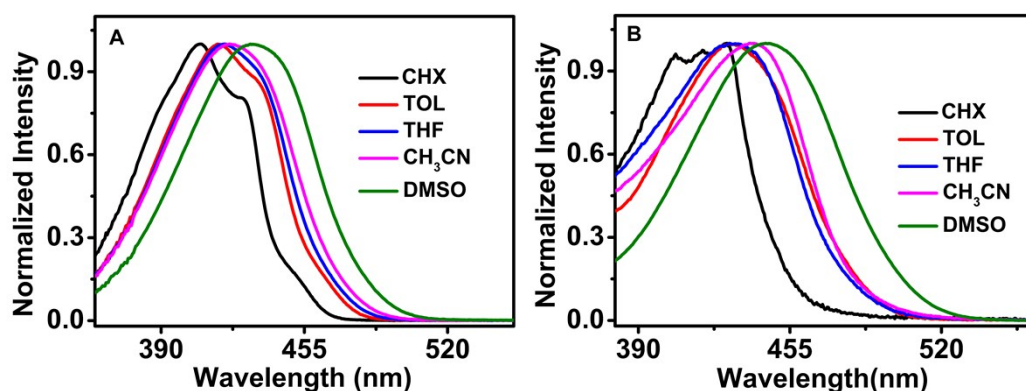

Figure S1 Absorption spectra of CS (A) and CS-P (B) in different solvents normalized to 1.0.

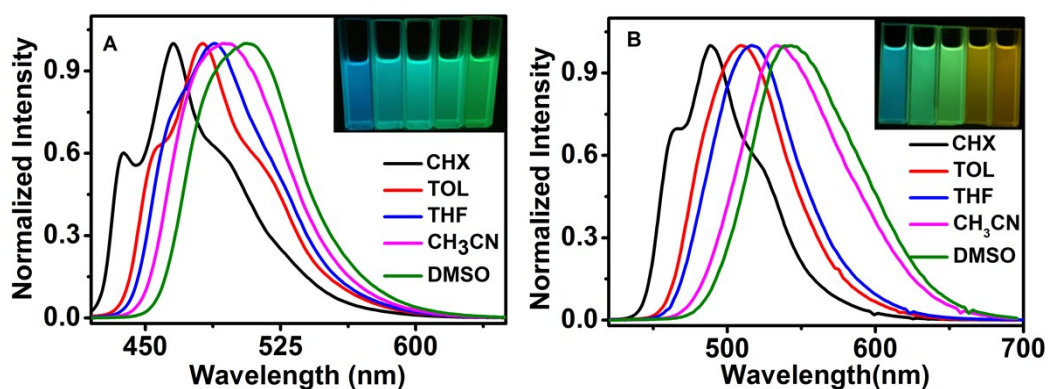

Figure S2 Fluorescence spectra of CS (A) and CS-P (B) in different organic solvent, the maxima peaks in CS-P showed strongly bathochromic-shift.

Table S1 UV-VIS and fluorescence emission data for CS and CS-P in different solvents.

| Dye  | Solvent           | $\lambda_{\max}$<br>(nm) | $\epsilon_{\max}$ (L mol <sup>-1</sup> cm <sup>-1</sup> ) | $\lambda_{\max}$<br>(nm) | stokes shift<br>(nm) |
|------|-------------------|--------------------------|-----------------------------------------------------------|--------------------------|----------------------|
| CS   | cyclohexane       | 408                      | $7.3 \times 10^4$                                         | 465                      | 57                   |
|      | toluene           | 416                      | $7.2 \times 10^4$                                         | 481                      | 65                   |
|      | tetrahydrofuran   | 420                      | $9.3 \times 10^4$                                         | 488                      | 68                   |
|      | acetonitrile      | 422                      | $7.6 \times 10^4$                                         | 495                      | 73                   |
|      | dimethylsulfoxide | 433                      | $7.7 \times 10^4$                                         | 507                      | 74                   |
| CS-P | cyclohexane       | 415                      | $1.1 \times 10^4$                                         | 489                      | 74                   |
|      | toluene           | 428                      | $2.9 \times 10^4$                                         | 510                      | 82                   |
|      | tetrahydrofuran   | 432                      | $2.2 \times 10^4$                                         | 517                      | 85                   |
|      | acetonitrile      | 440                      | $3.0 \times 10^4$                                         | 533                      | 93                   |
|      | dimethylsulfoxide | 446                      | $6.7 \times 10^4$                                         | 542                      | 96                   |

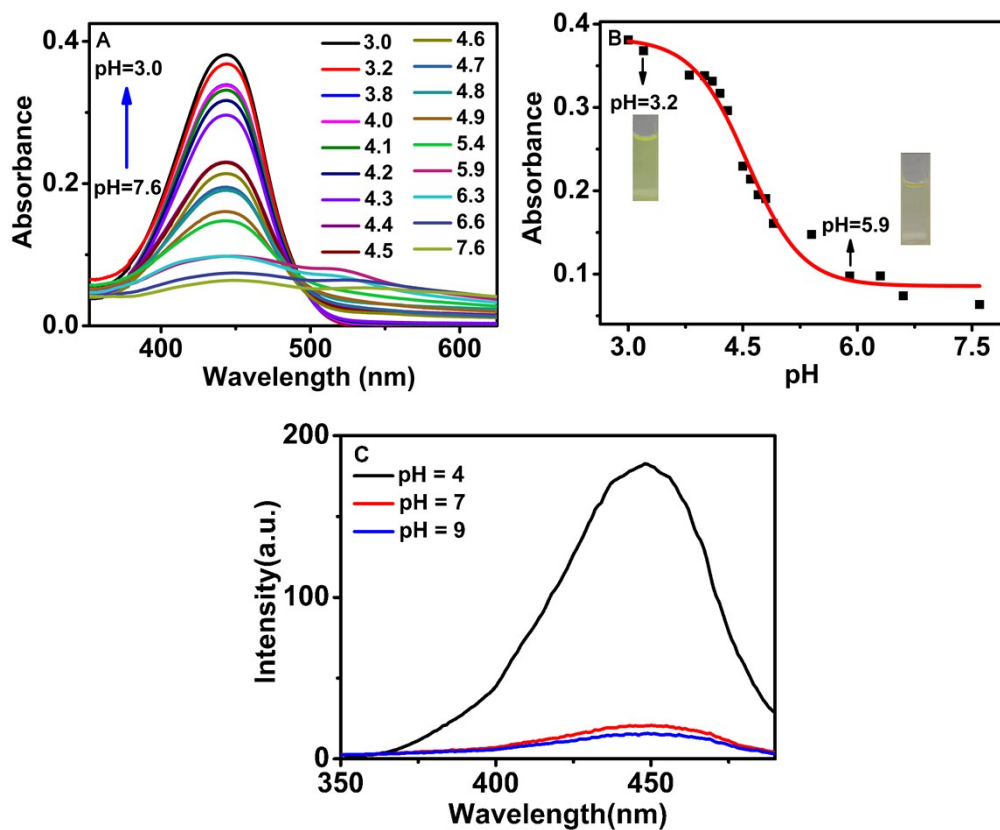

**Figure S3** (A) Absorption spectra of CS-P (4  $\mu\text{M}$ ) in DMSO-water solution (1:1, v/v) at different pH values, (B) The absorption curve of CS-P at different pH values based on the intensity peaks at 443 nm, (C) The excitation spectra of CS-P (4  $\mu\text{M}$ ) in DMSO-water solution (1:1, v/v) at different pH values.

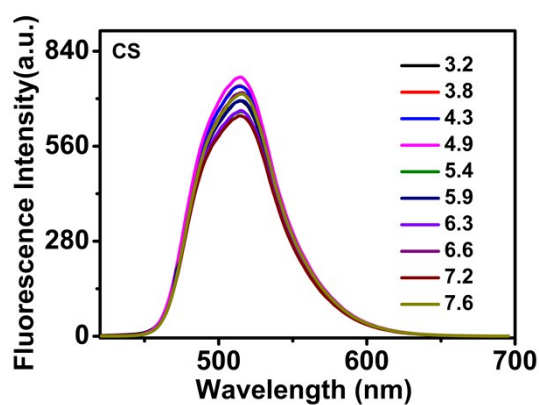

**Figure S4.** Fluorescence spectra of CS (4  $\mu\text{M}$ ) in various pH (7.6-3.2) in DMSO-water (1:1, v/v) solution ( $\lambda_{\text{ex}} = 400 \text{ nm}$ ).

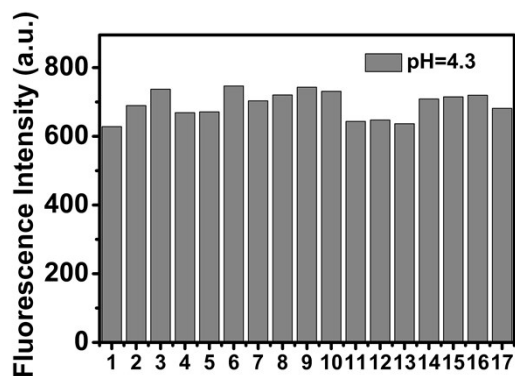

**Figure S5** Ion interfering to CS-P. 1) H<sup>+</sup>; 2) Mg<sup>2+</sup>; 3) Na<sup>+</sup>; 4) Mn<sup>2+</sup>; 5) Ba<sup>2+</sup>; 6) K<sup>+</sup>; 7) Ca<sup>2+</sup>; 8) Cu<sup>2+</sup>; 9) Fe<sup>3+</sup>; 10) Cr<sup>3+</sup>; 11) Fe<sup>2+</sup>; 12) Ni<sup>2+</sup>; 13) Hg<sup>2+</sup>; 14) Pb<sup>2+</sup>; 15) Zn<sup>2+</sup>; 16) Cys; 17) GSH. The maxima peak value of fluorescence spectra in DMSO-water (1:1, v/v) solution at pH 4.3, which proved that different ions had negligible effect on the fluorescent property of CS-P.

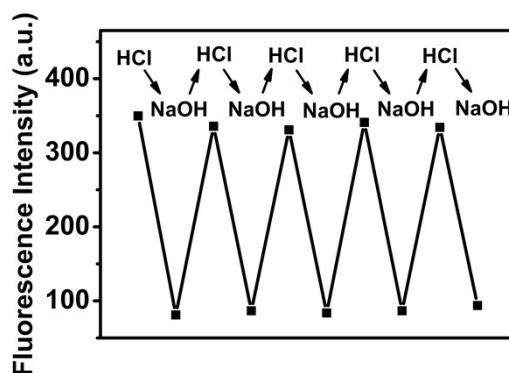

**Figure S6** Reversibility of CS-P. Fluorescent intensities of CS-P in DMSO-water (1:1, v/v) solution with changed pH value by adding HCl or NaOH repeatedly, which proved the reversibility of fluorescence intensity of CS-P by changing pH value simply ( $\lambda_{\text{ex}} = 400 \text{ nm}$ ).

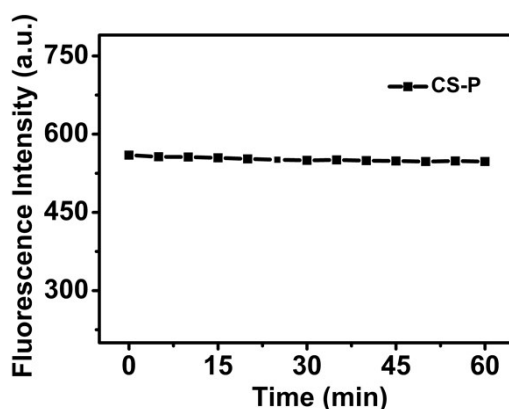

**Figure S7** Photostability of CS-P. The fluorescent intensities of CS-P did not decreased within 60 minutes of continuous excitation, which indicated high photostability of CS-P ( $\lambda_{\text{ex}} = 400 \text{ nm}$  and  $\lambda_{\text{em}} = 515 \text{ nm}$ ).

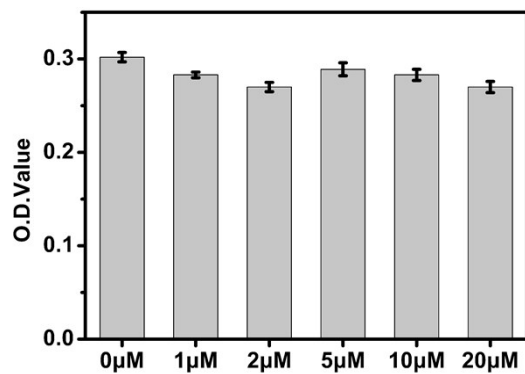

**Figure S8** Cytotoxic experiment of CS-P via MTT method. The number of MG63 cells did not decreased after treatment with different concentrations of CS-P for 24 hours.

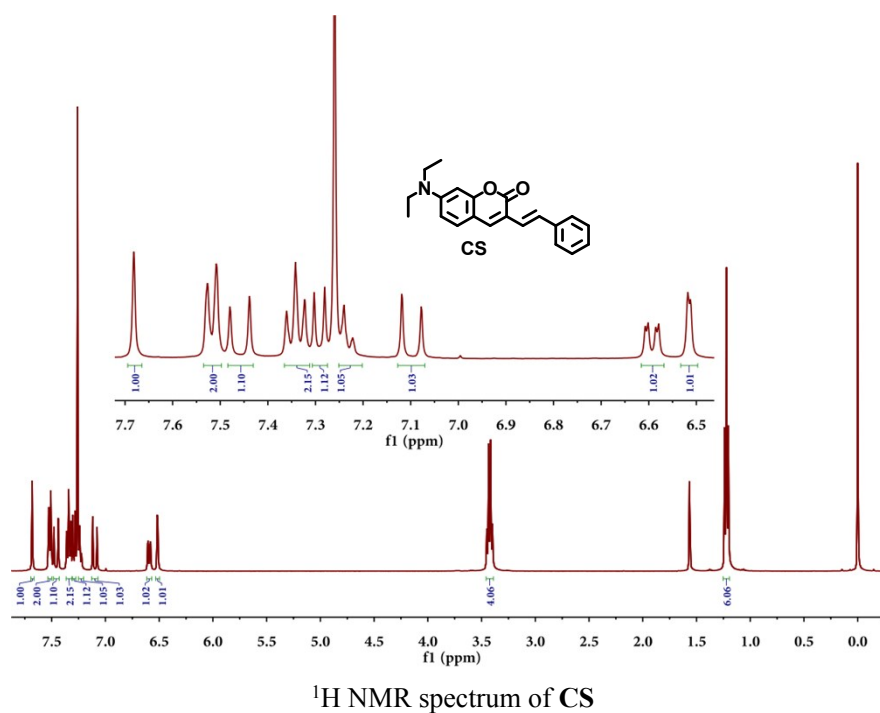

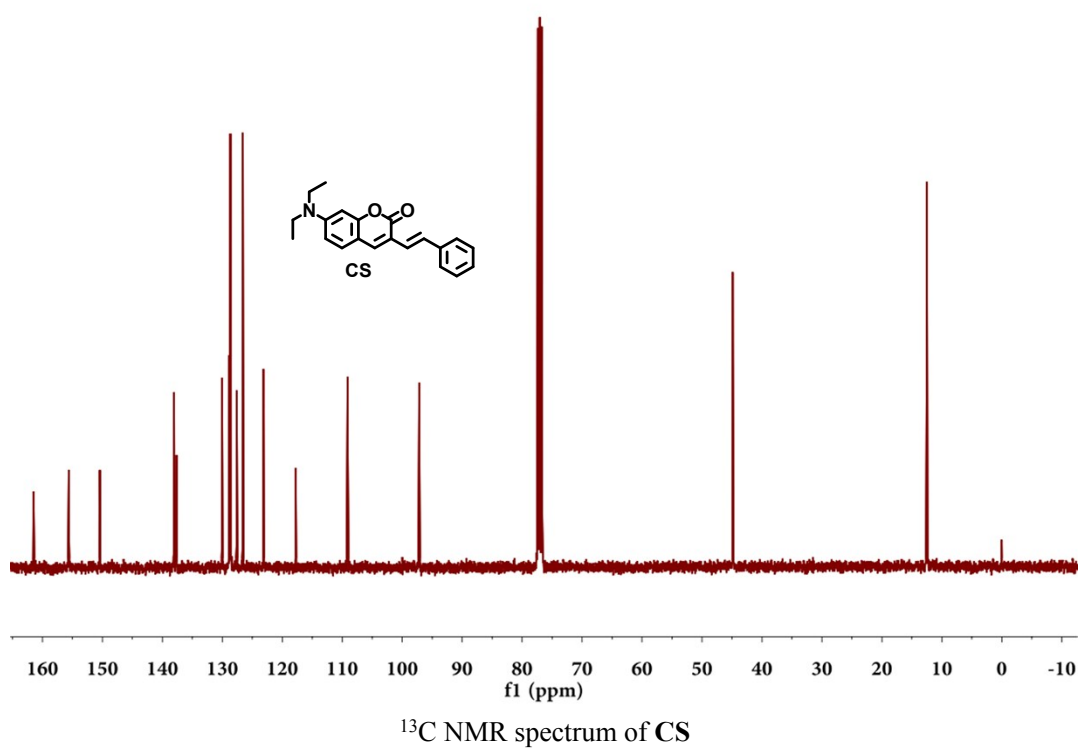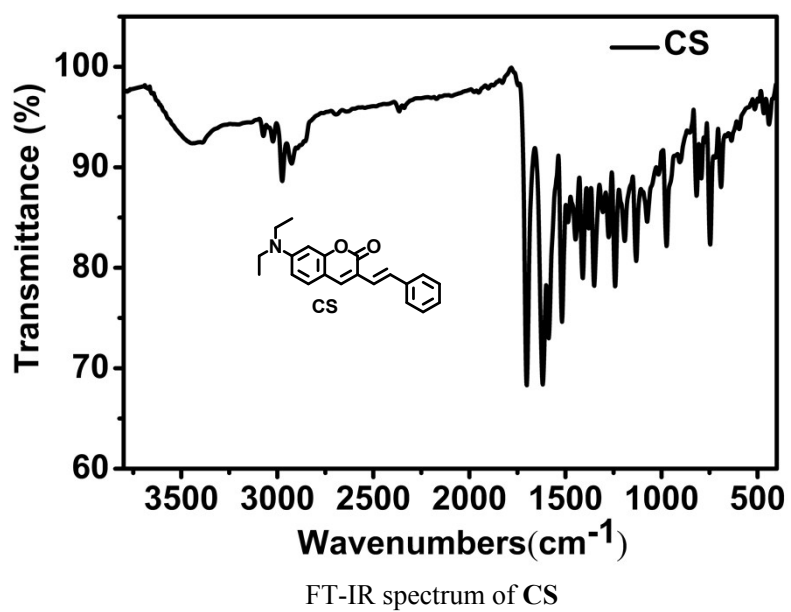

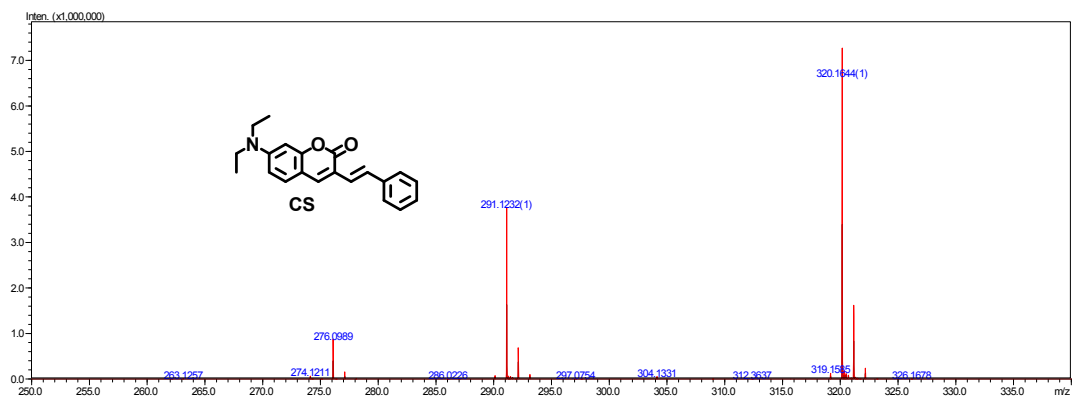

HR-ESI-MS spectrum of CS

Figure S9  $^1\text{H}$  NMR,  $^{13}\text{C}$  NMR, FT-IR and HR-ESI-MS spectrum of CS

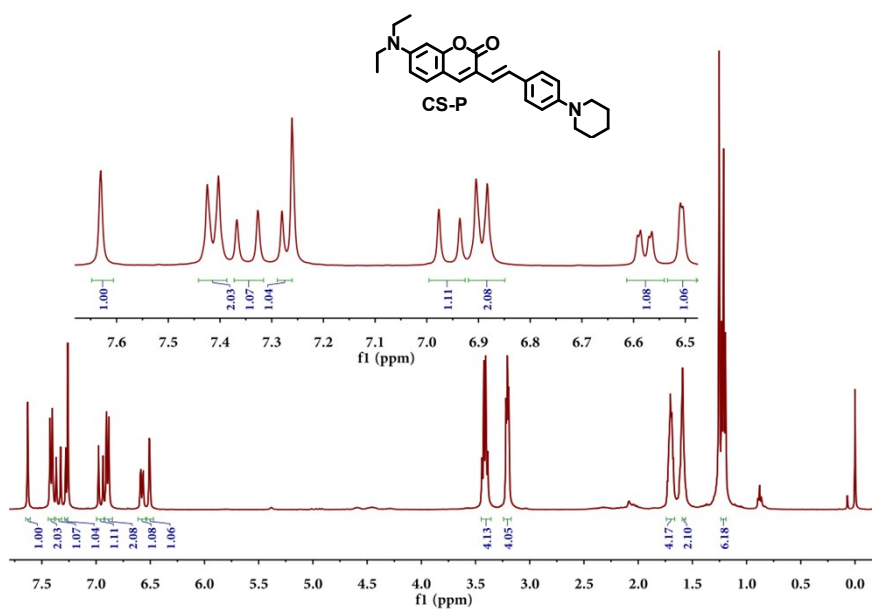

$^1\text{H}$  NMR spectrum of CS-P



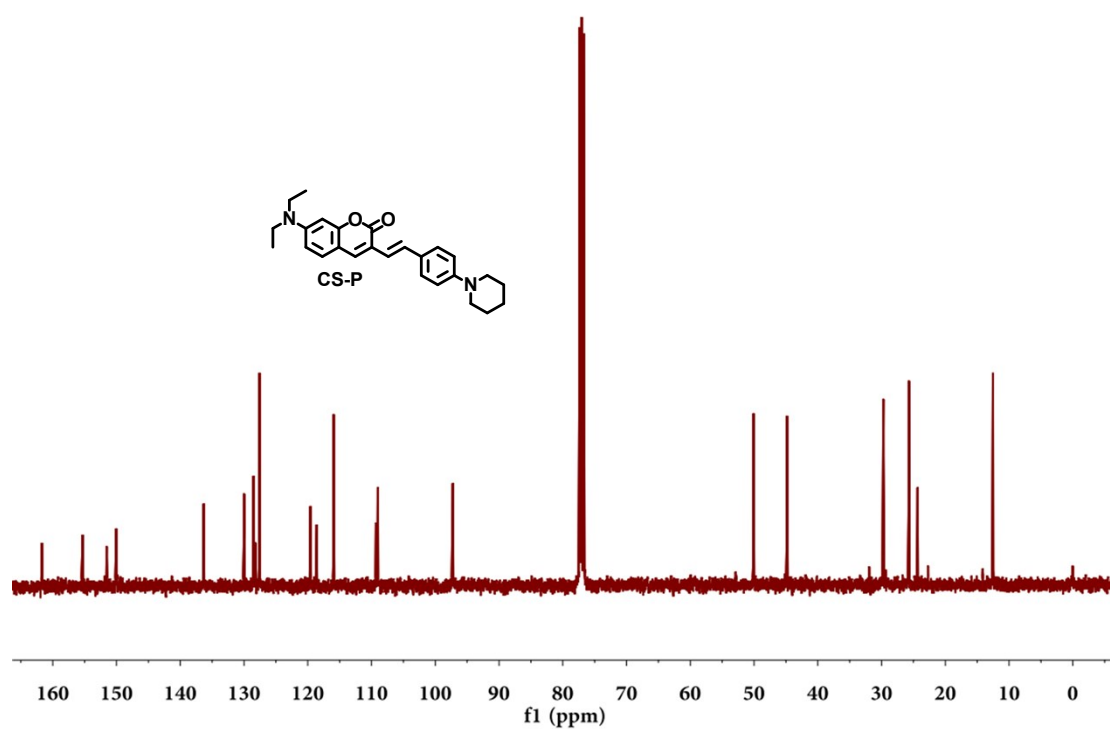

<sup>13</sup>C NMR spectrum of CS-P

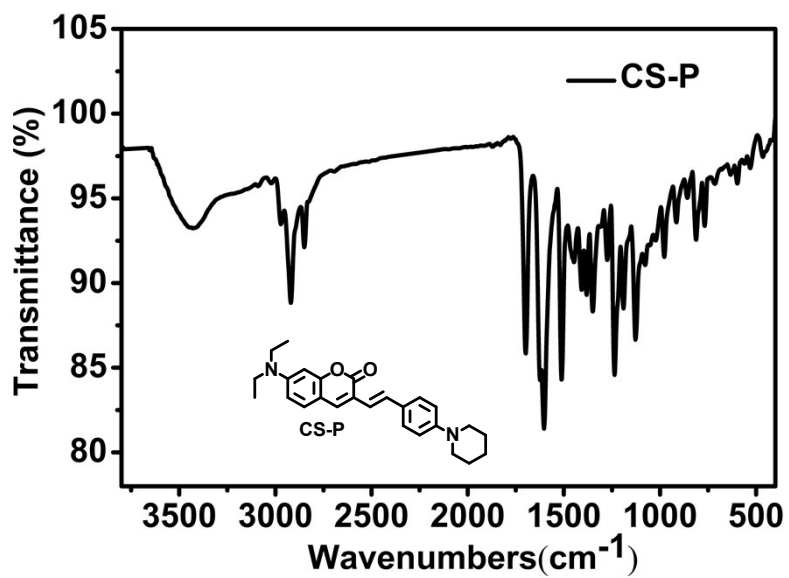

FT-IR spectrum of CS-P

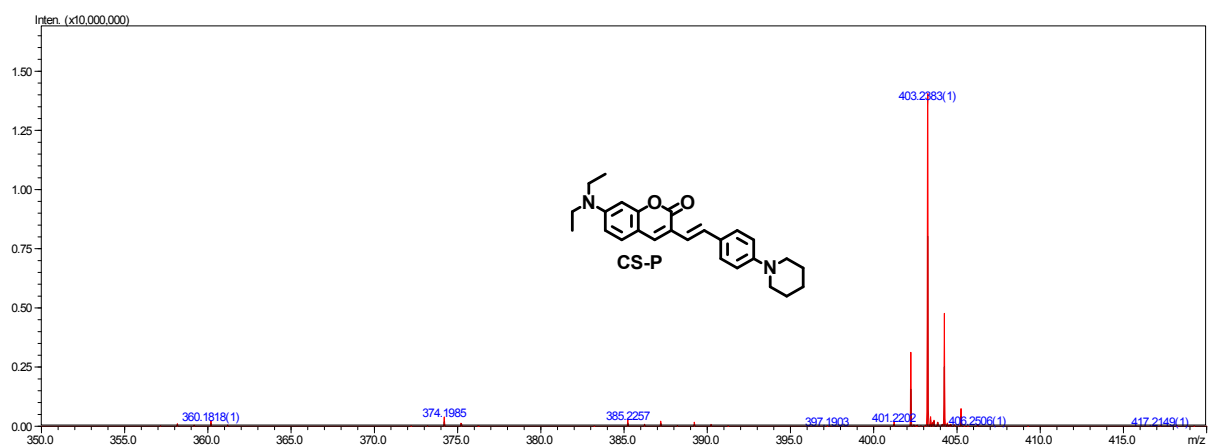

HR-ESI-MS spectrum of CS-P

**Figure S10**  $^1\text{H}$  NMR,  $^{13}\text{C}$  NMR, FT-IR and HR-ESI-MS spectrum of CS-P
